# Supplementary material for: High-quality graphene transfer via directional etching of metal substrates
Source: Royal Society of Chemistry journal article supplement (doi:10.1039/c9nr05315h), 2019-01-01
Supplement: c9nr05315h1.pdf [file c9nr05315h1.pdf]

## Electronic Supplementary Information

# High-Quality Graphene Transfer *via* Directional Etching of Metal Substrates

*Xuwei Zhang*<sup>a,1</sup>, *Zehao Wu*<sup>a,1</sup>, *Haoran Zheng*<sup>a</sup>, *Qiancheng Ren*<sup>a</sup>, *Zhenxing Zou*<sup>a</sup>, *Le Mei*<sup>a</sup>,  
*Zilong Zhang*<sup>a</sup>, *Yang Xia*<sup>b</sup>, *Cheng-Te Lin*<sup>c</sup>, *Pei Zhao*<sup>a,\*</sup>, *Hongtao Wang*<sup>a,\*</sup>

### Supplemental figures

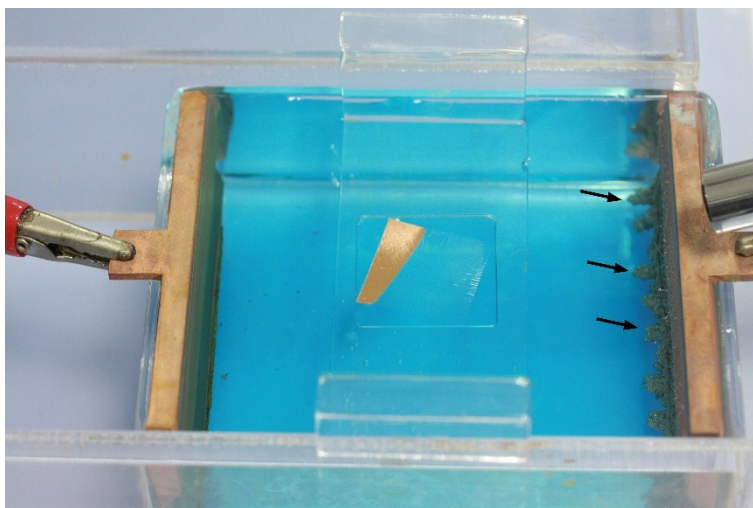

**Fig. S1.** The photo of the DE setup. The two 7.5 cm×4 cm×5 mm Cu electrodes are connected to the external circuit, and the distance of the two electrodes is around 8.5 cm. An optional current of the circuit is 0.15 A. The arrows indicate the accumulation of Cu from the electrochemical reaction.

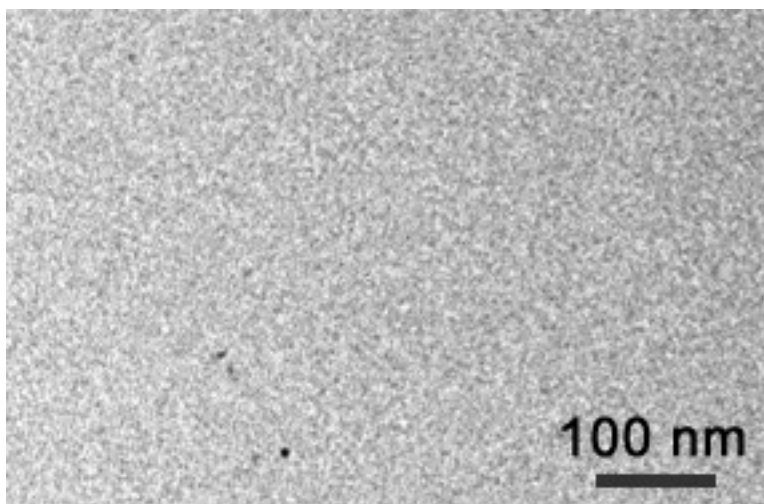

**Fig. S2.** TEM image of the DE-transferred graphene film on a TEM grid.

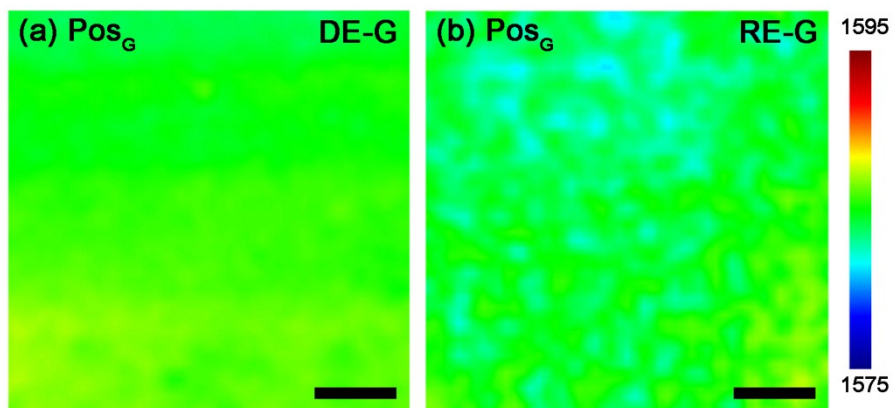

**Fig. S3.** The position maps of G peaks in DE- and RE-transferred graphene film. The scale bars are 100 μm.

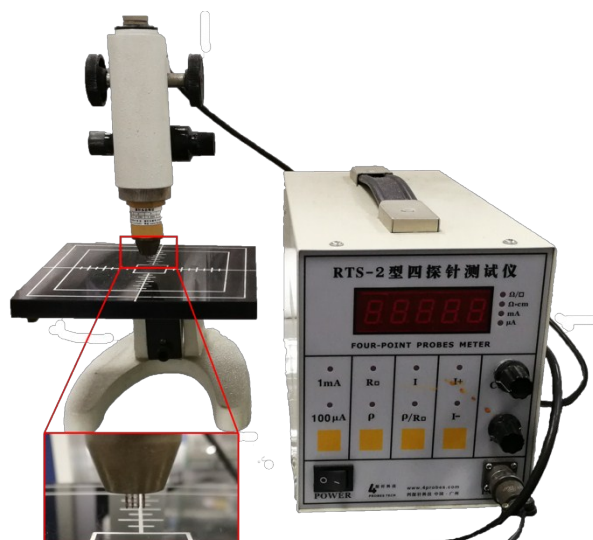

**Fig. S4.** A photo of the four-point probe station. The inset is the zoomed view of the four points with 1 mm interval space.

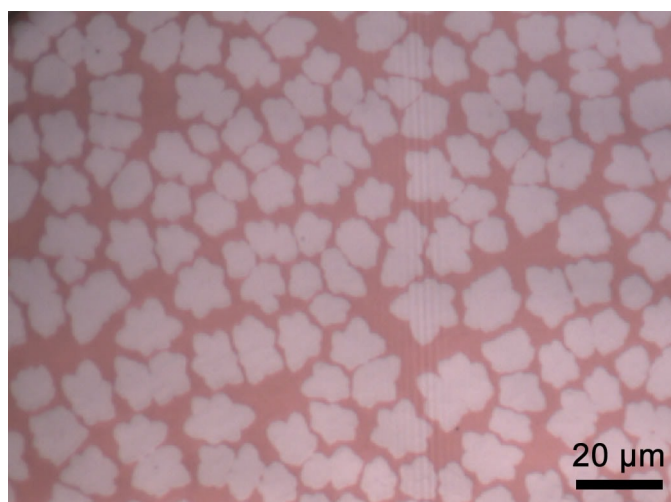

**Fig. S5.** The average domain size of this graphene samples is  $\sim 5\text{--}10\ \mu\text{m}$  characterized by halted CVD experiments for incomplete graphene films.

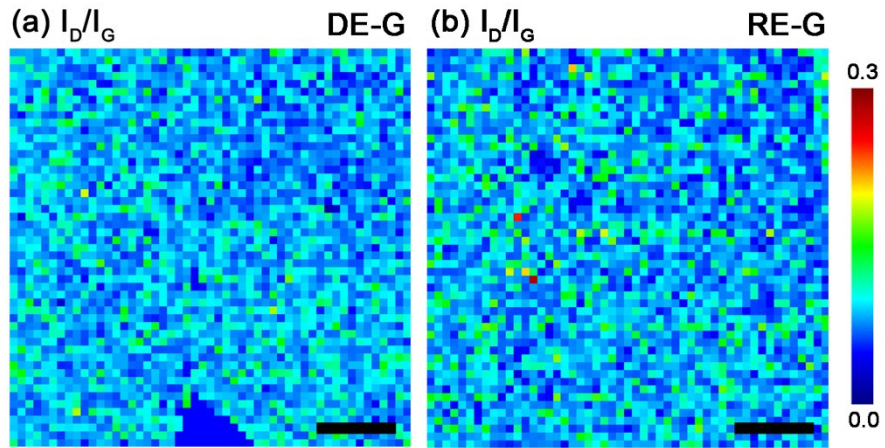

**Fig. S6.** The  $I_D/I_G$  maps in DE- and RE-transferred graphene film. The scale bars are 100  $\mu\text{m}$ .
